# Supplementary material for: A predicted protein interactome for rice
Source: PubMed Central journal article supplement (PMC4883691; doi:10.1186/1939-8433-5-15), 2012-07-02

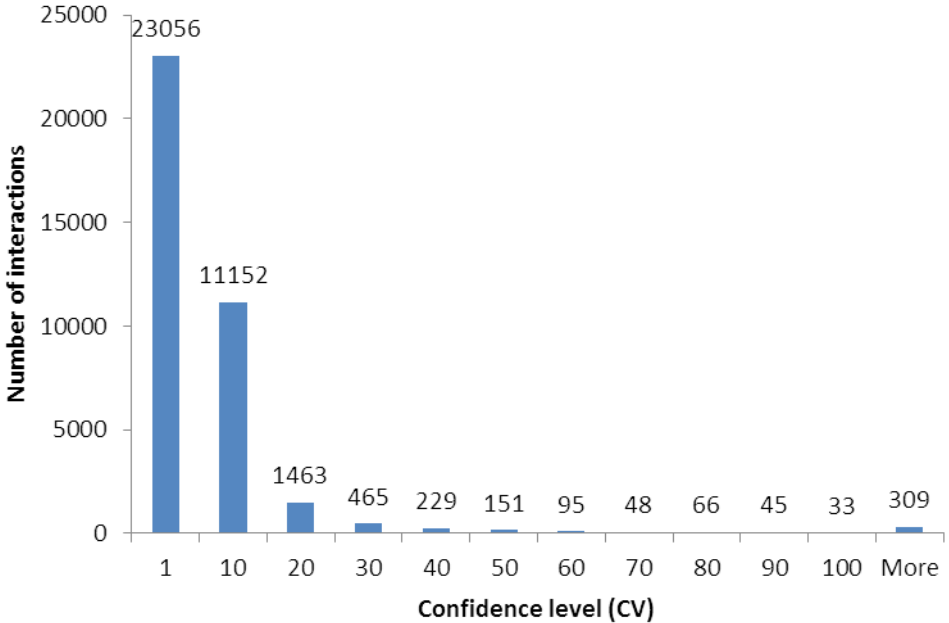

Supplement: 12284_2012_30_MOESM5_ESM.pdf [file 12284_2012_30_MOESM5_ESM.pdf]
