# Supplementary material for: A predicted protein interactome for rice
Source: PubMed Central journal article supplement (PMC4883691; doi:10.1186/1939-8433-5-15), 2012-07-02
Supplement: 12284_2012_30_MOESM9_ESM.pdf [file 12284_2012_30_MOESM9_ESM.pdf]

|              |              |          |             |           |      |           | Enrichment |              | Depletion |            |         |         |
|--------------|--------------|----------|-------------|-----------|------|-----------|------------|--------------|-----------|------------|---------|---------|
|              |              |          |             |           |      |           | P<0.01     | P<0.1        | P<0.01    | P<0.1      |         |         |
| Cellmembrane | 217          |          |             |           |      |           |            |              |           |            |         |         |
| Cellwall     | 53           | 3        |             |           |      |           |            |              |           |            |         |         |
| Chloroplast  | 1138         | 140      | 2134        |           |      |           |            |              |           |            |         |         |
| Cytoplasm    | 1070         | 187      | 3630        | 1654      |      |           |            |              |           |            |         |         |
| ER           | 281          | 47       | 814         | 693       | 130  |           |            |              |           |            |         |         |
| Extracell    | 19           | 3        | 65          | 73        | 9    | 0         |            |              |           |            |         |         |
| Gologi       | 167          | 27       | 393         | 390       | 154  | 2         | 63         |              |           |            |         |         |
| Mitochondria | 760          | 120      | 2381        | 2301      | 444  | 55        | 236        | 897          |           |            |         |         |
| Nucleus      | 2341         | 318      | 6931        | 6463      | 1404 | 138       | 808        | 4344         | 7548      |            |         |         |
| Peroxisome   | 65           | 8        | 200         | 200       | 39   | 4         | 21         | 144          | 359       | 4          |         |         |
| Plastid      | 29           | 2        | 90          | 83        | 13   | 1         | 10         | 78           | 147       | 8          | 1       |         |
| Vacuole      | 173          | 24       | 438         | 443       | 104  | 6         | 77         | 252          | 917       | 28         | 15      | 44      |
|              | Cellmembrane | Cellwall | Chloroplast | Cytoplasm | ER   | Extracell | Gologi     | Mitochondria | Nucleus   | Peroxisome | Plastid | Vacuole |
